# Supplementary material for: Cubane Copper(I) Iodide Clusters with Remotely Functionalized Phosphine Ligands: Synthesis, Structural Characterization and Optical Properties
Source: MDPI journal article supplement (doi:10.3390/sym15061210), 2023-06-06
Supplement: s1 [file s1]

Archive with 1 entries (1 files):
- symmetry-2409736-supplementary.pdf
